# Supplementary material
Source: PubMed Central journal article supplement (PMC4396602)

A

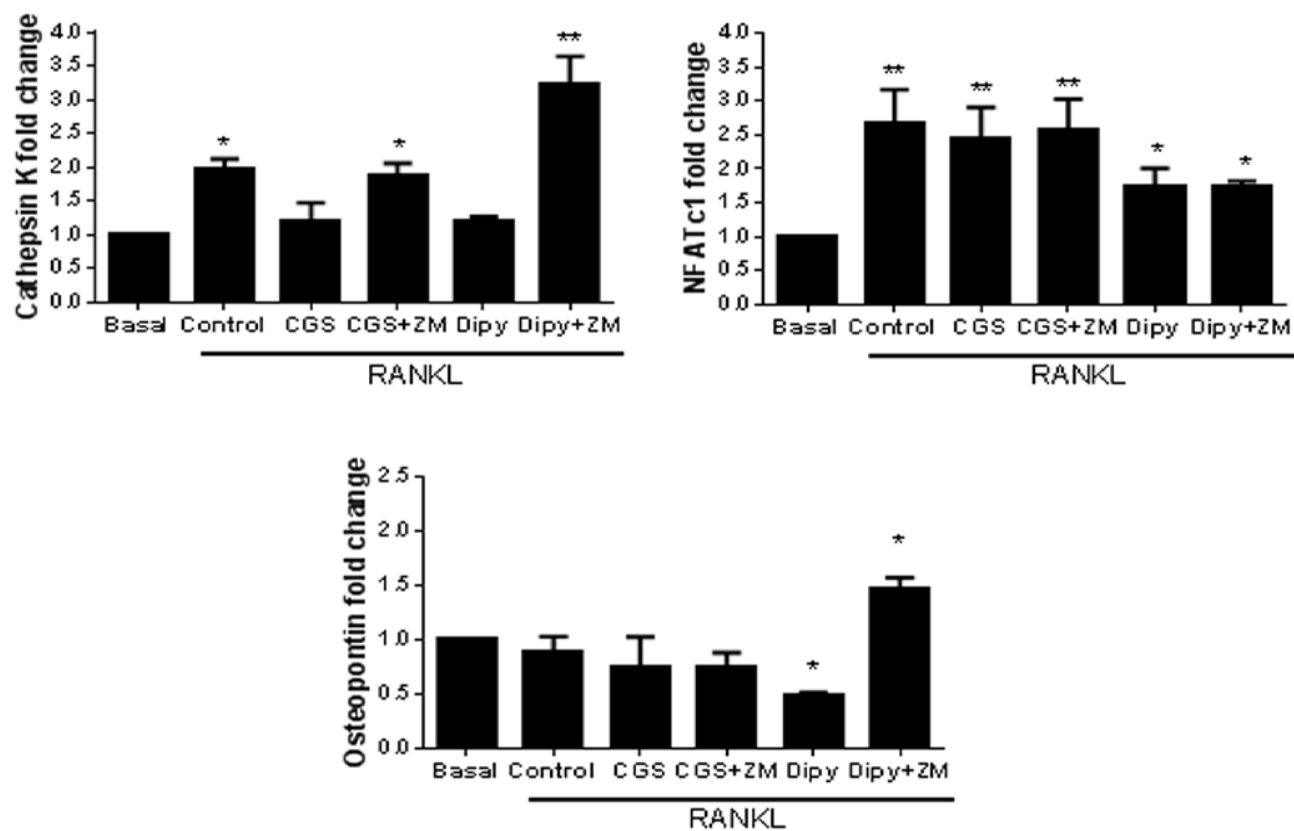

B

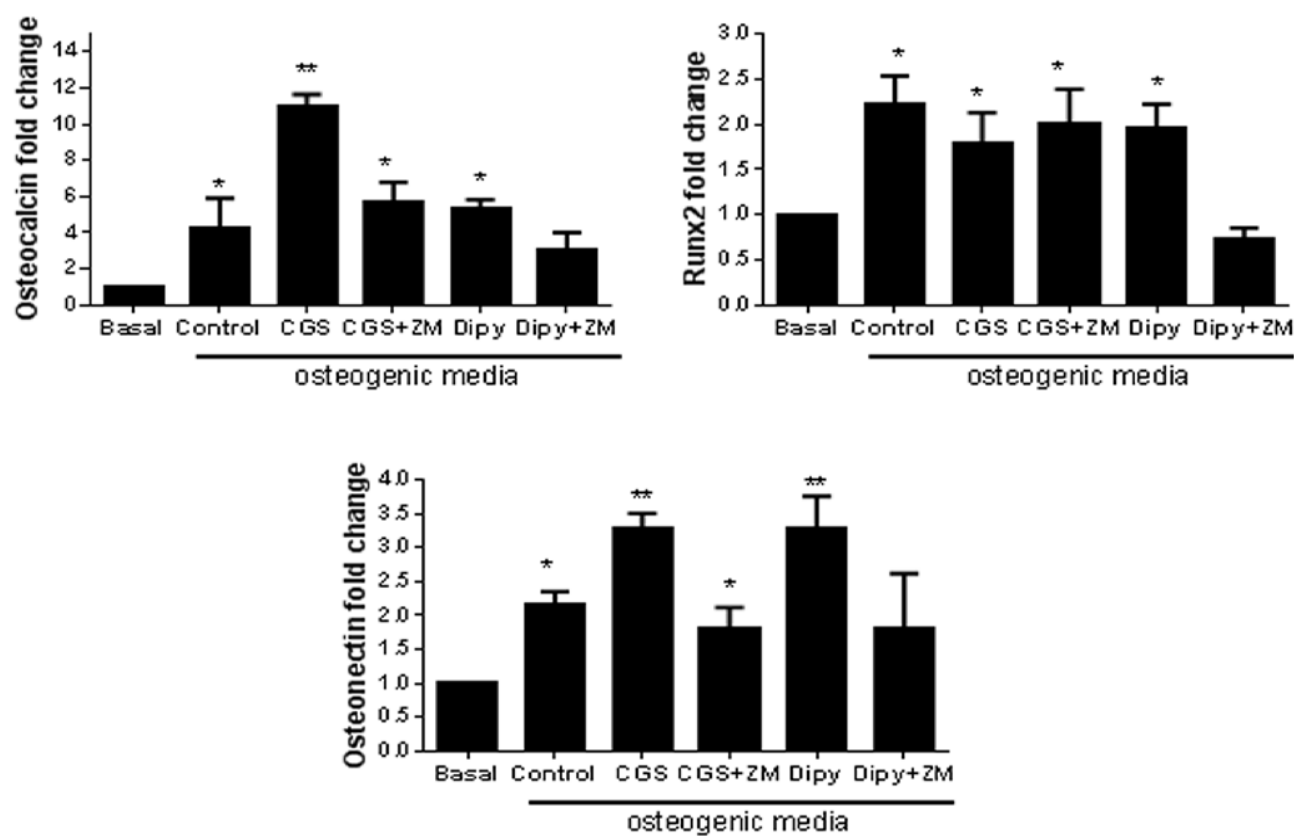

Supplement: supp_fj.14-265066_Supplemental_Figure1.pdf [file supp_fj.14-265066_Supplemental_Figure1.pdf]

A

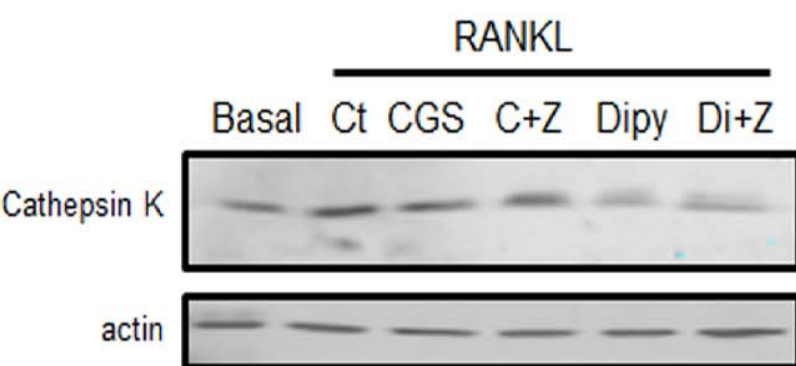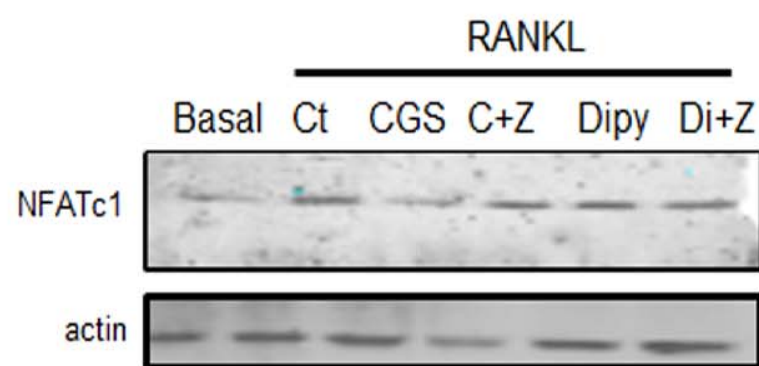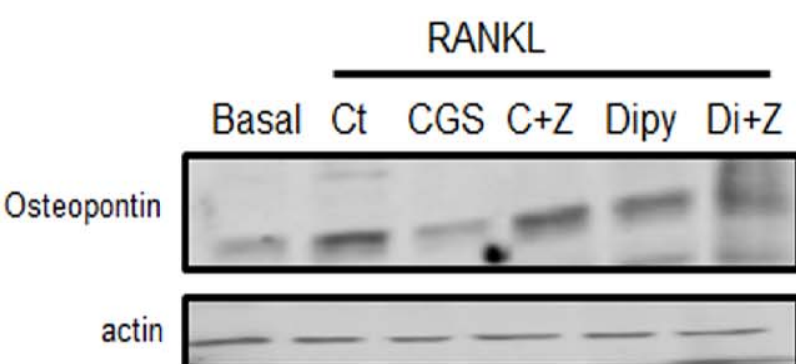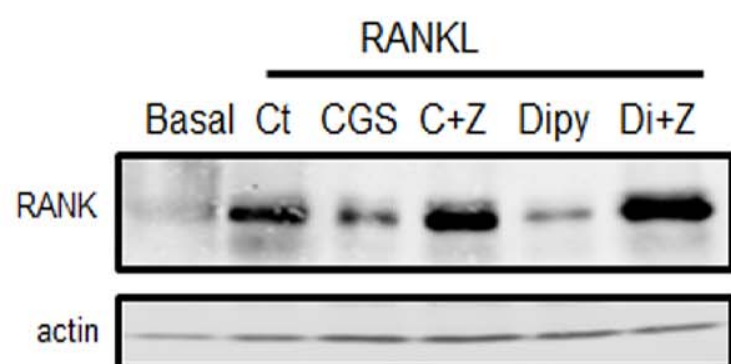

B

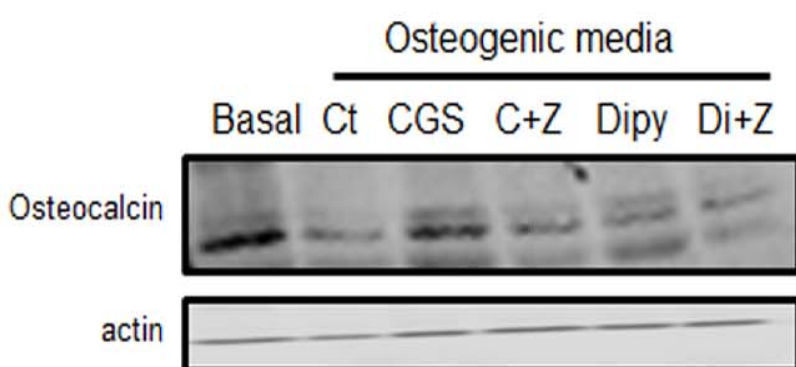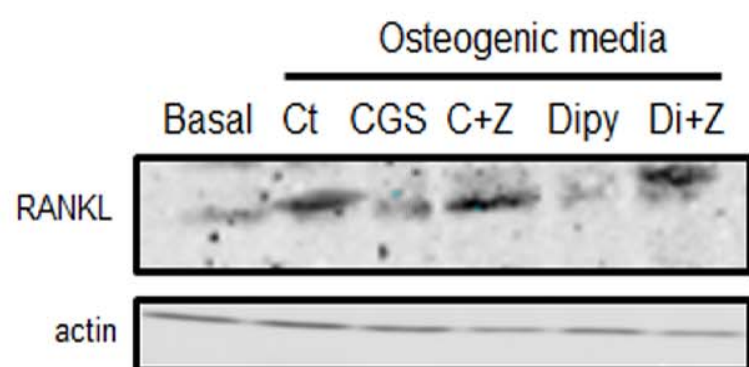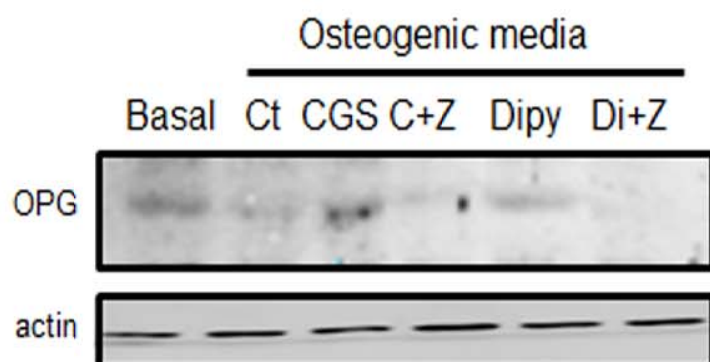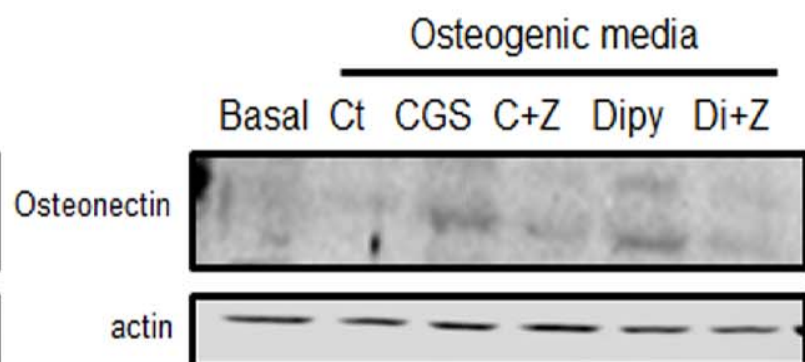

Supplement: supp_fj.14-265066_Supplemental_Figure2.pdf [file supp_fj.14-265066_Supplemental_Figure2.pdf]
